# Supplementary material for: Systemic inflammatory biomarkers as prognostic tools in patients with gastroesophageal adenocarcinoma
Source: Springer Nature journal article supplement (doi:10.1007/s00432-023-05424-4), 2023-09-26

**Fig. A****p<0.001**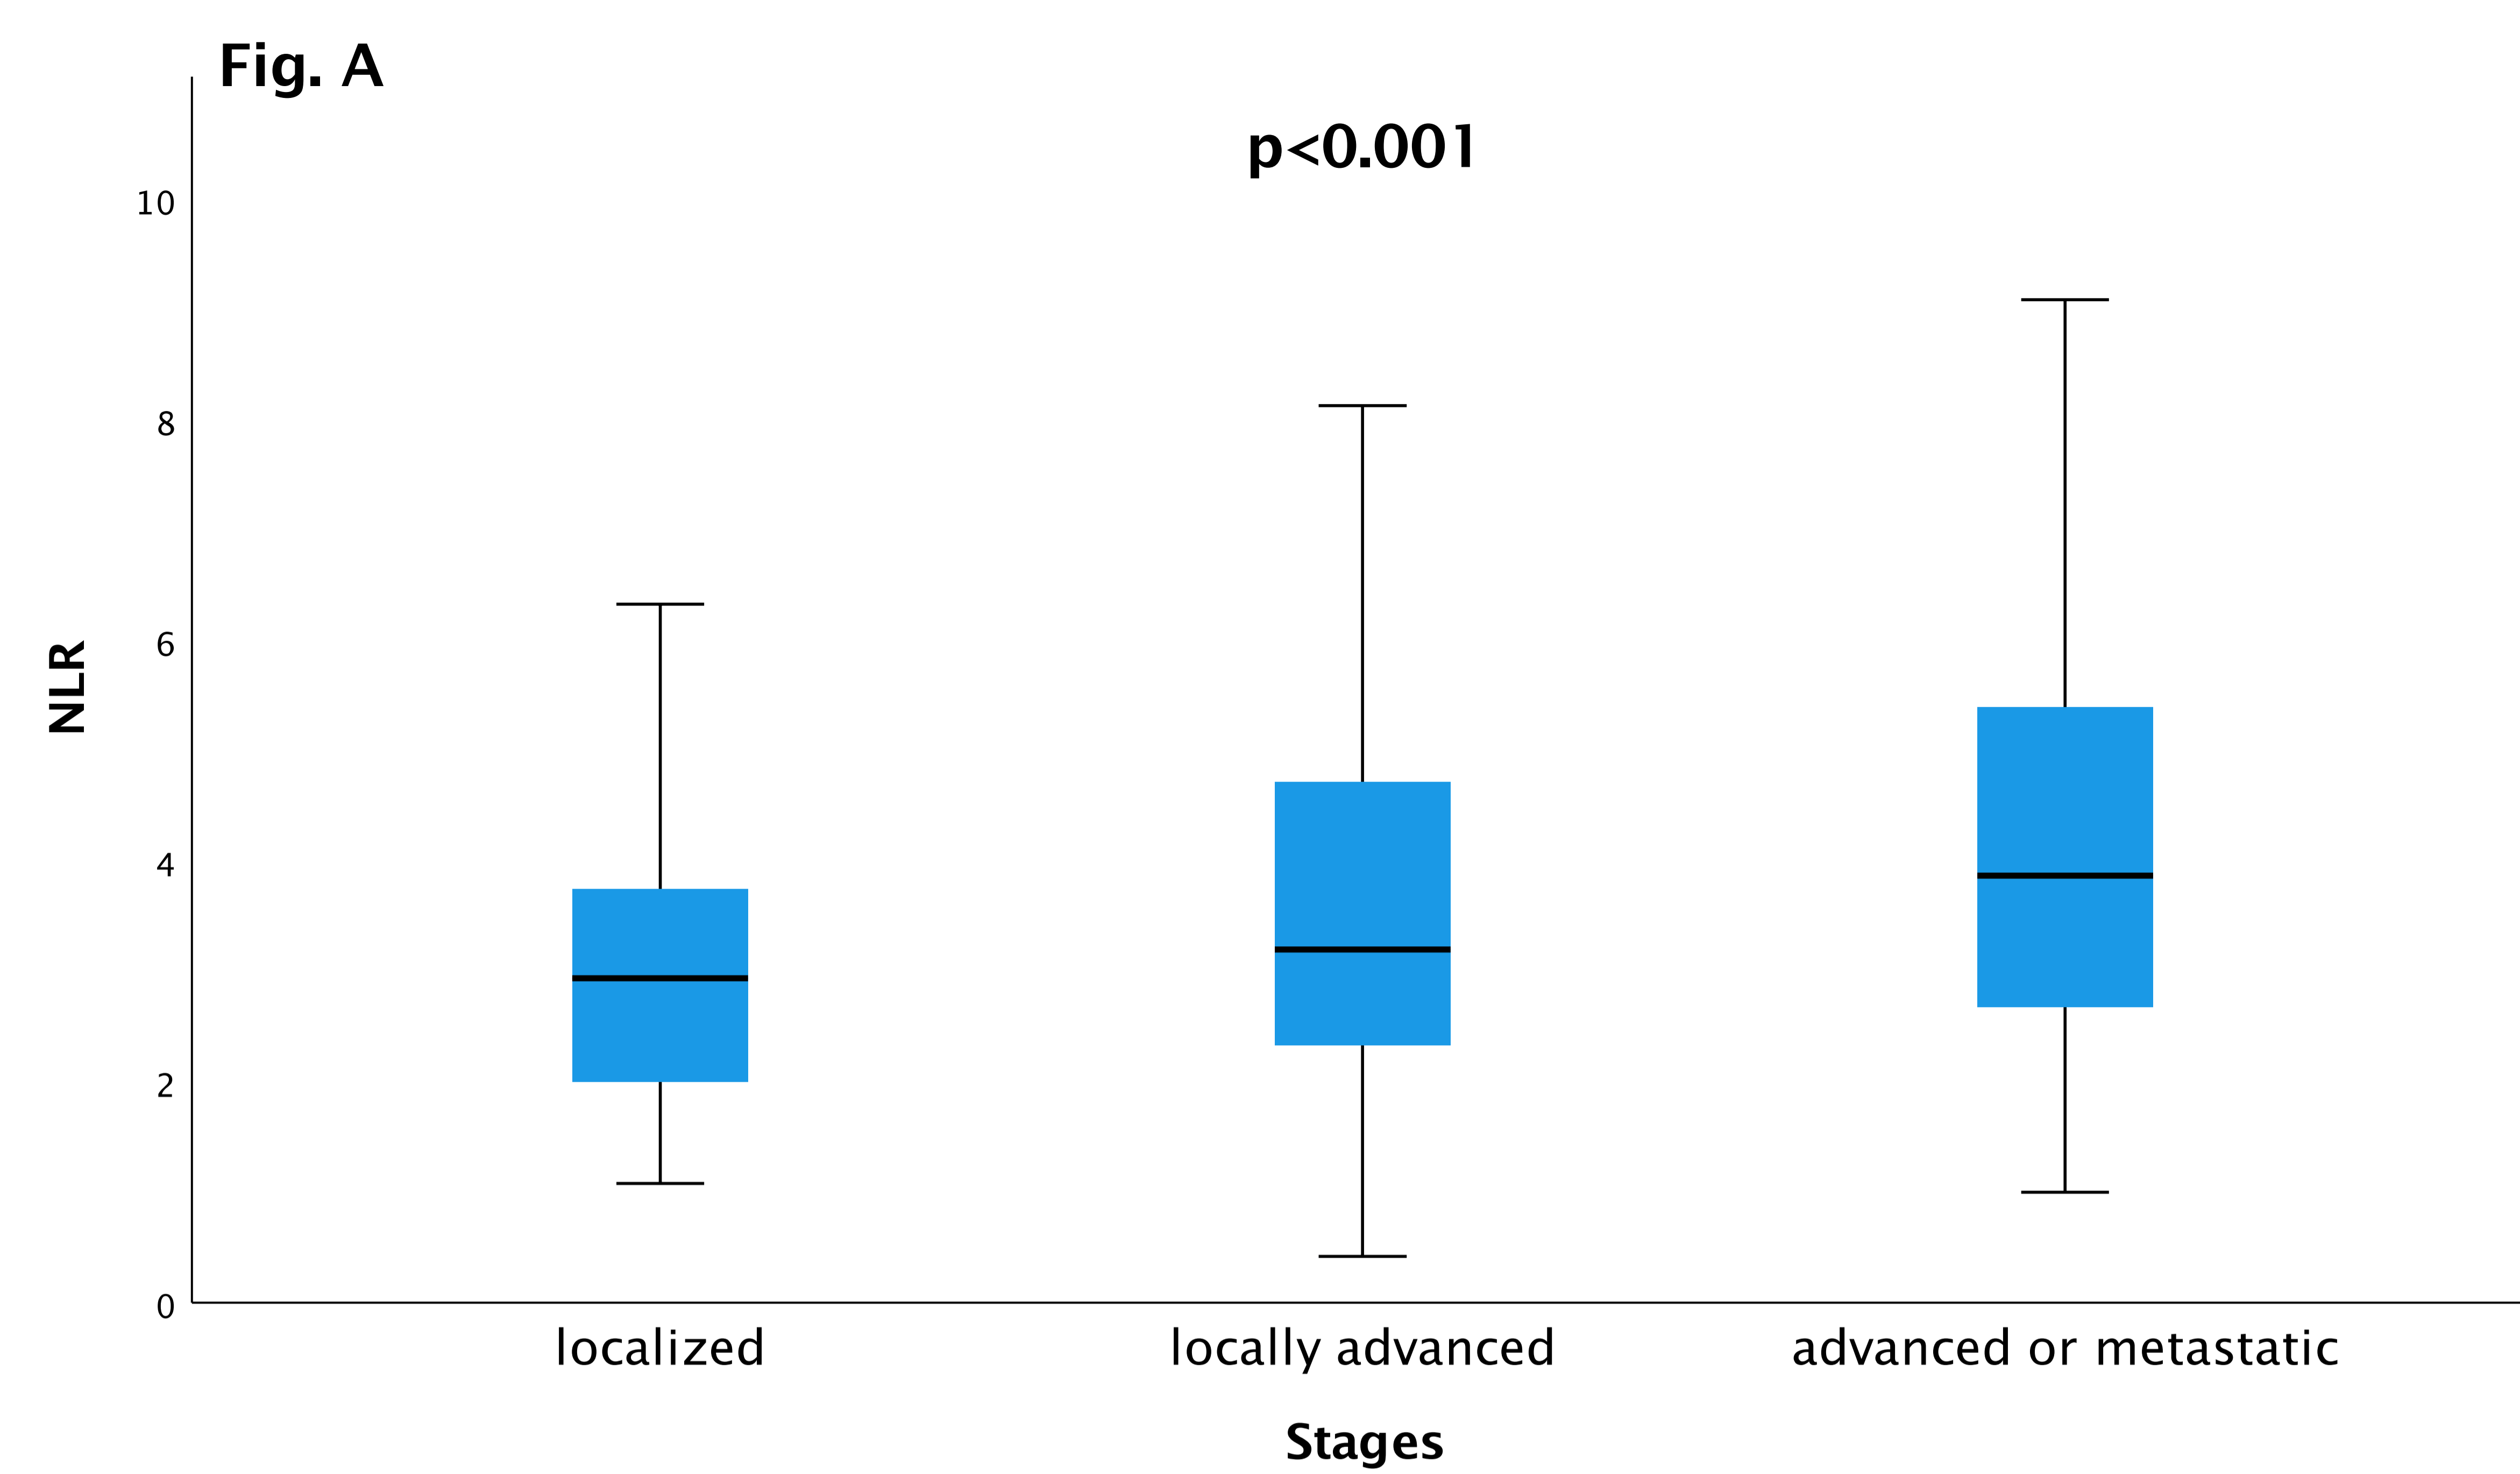**Fig. B****p<0.001**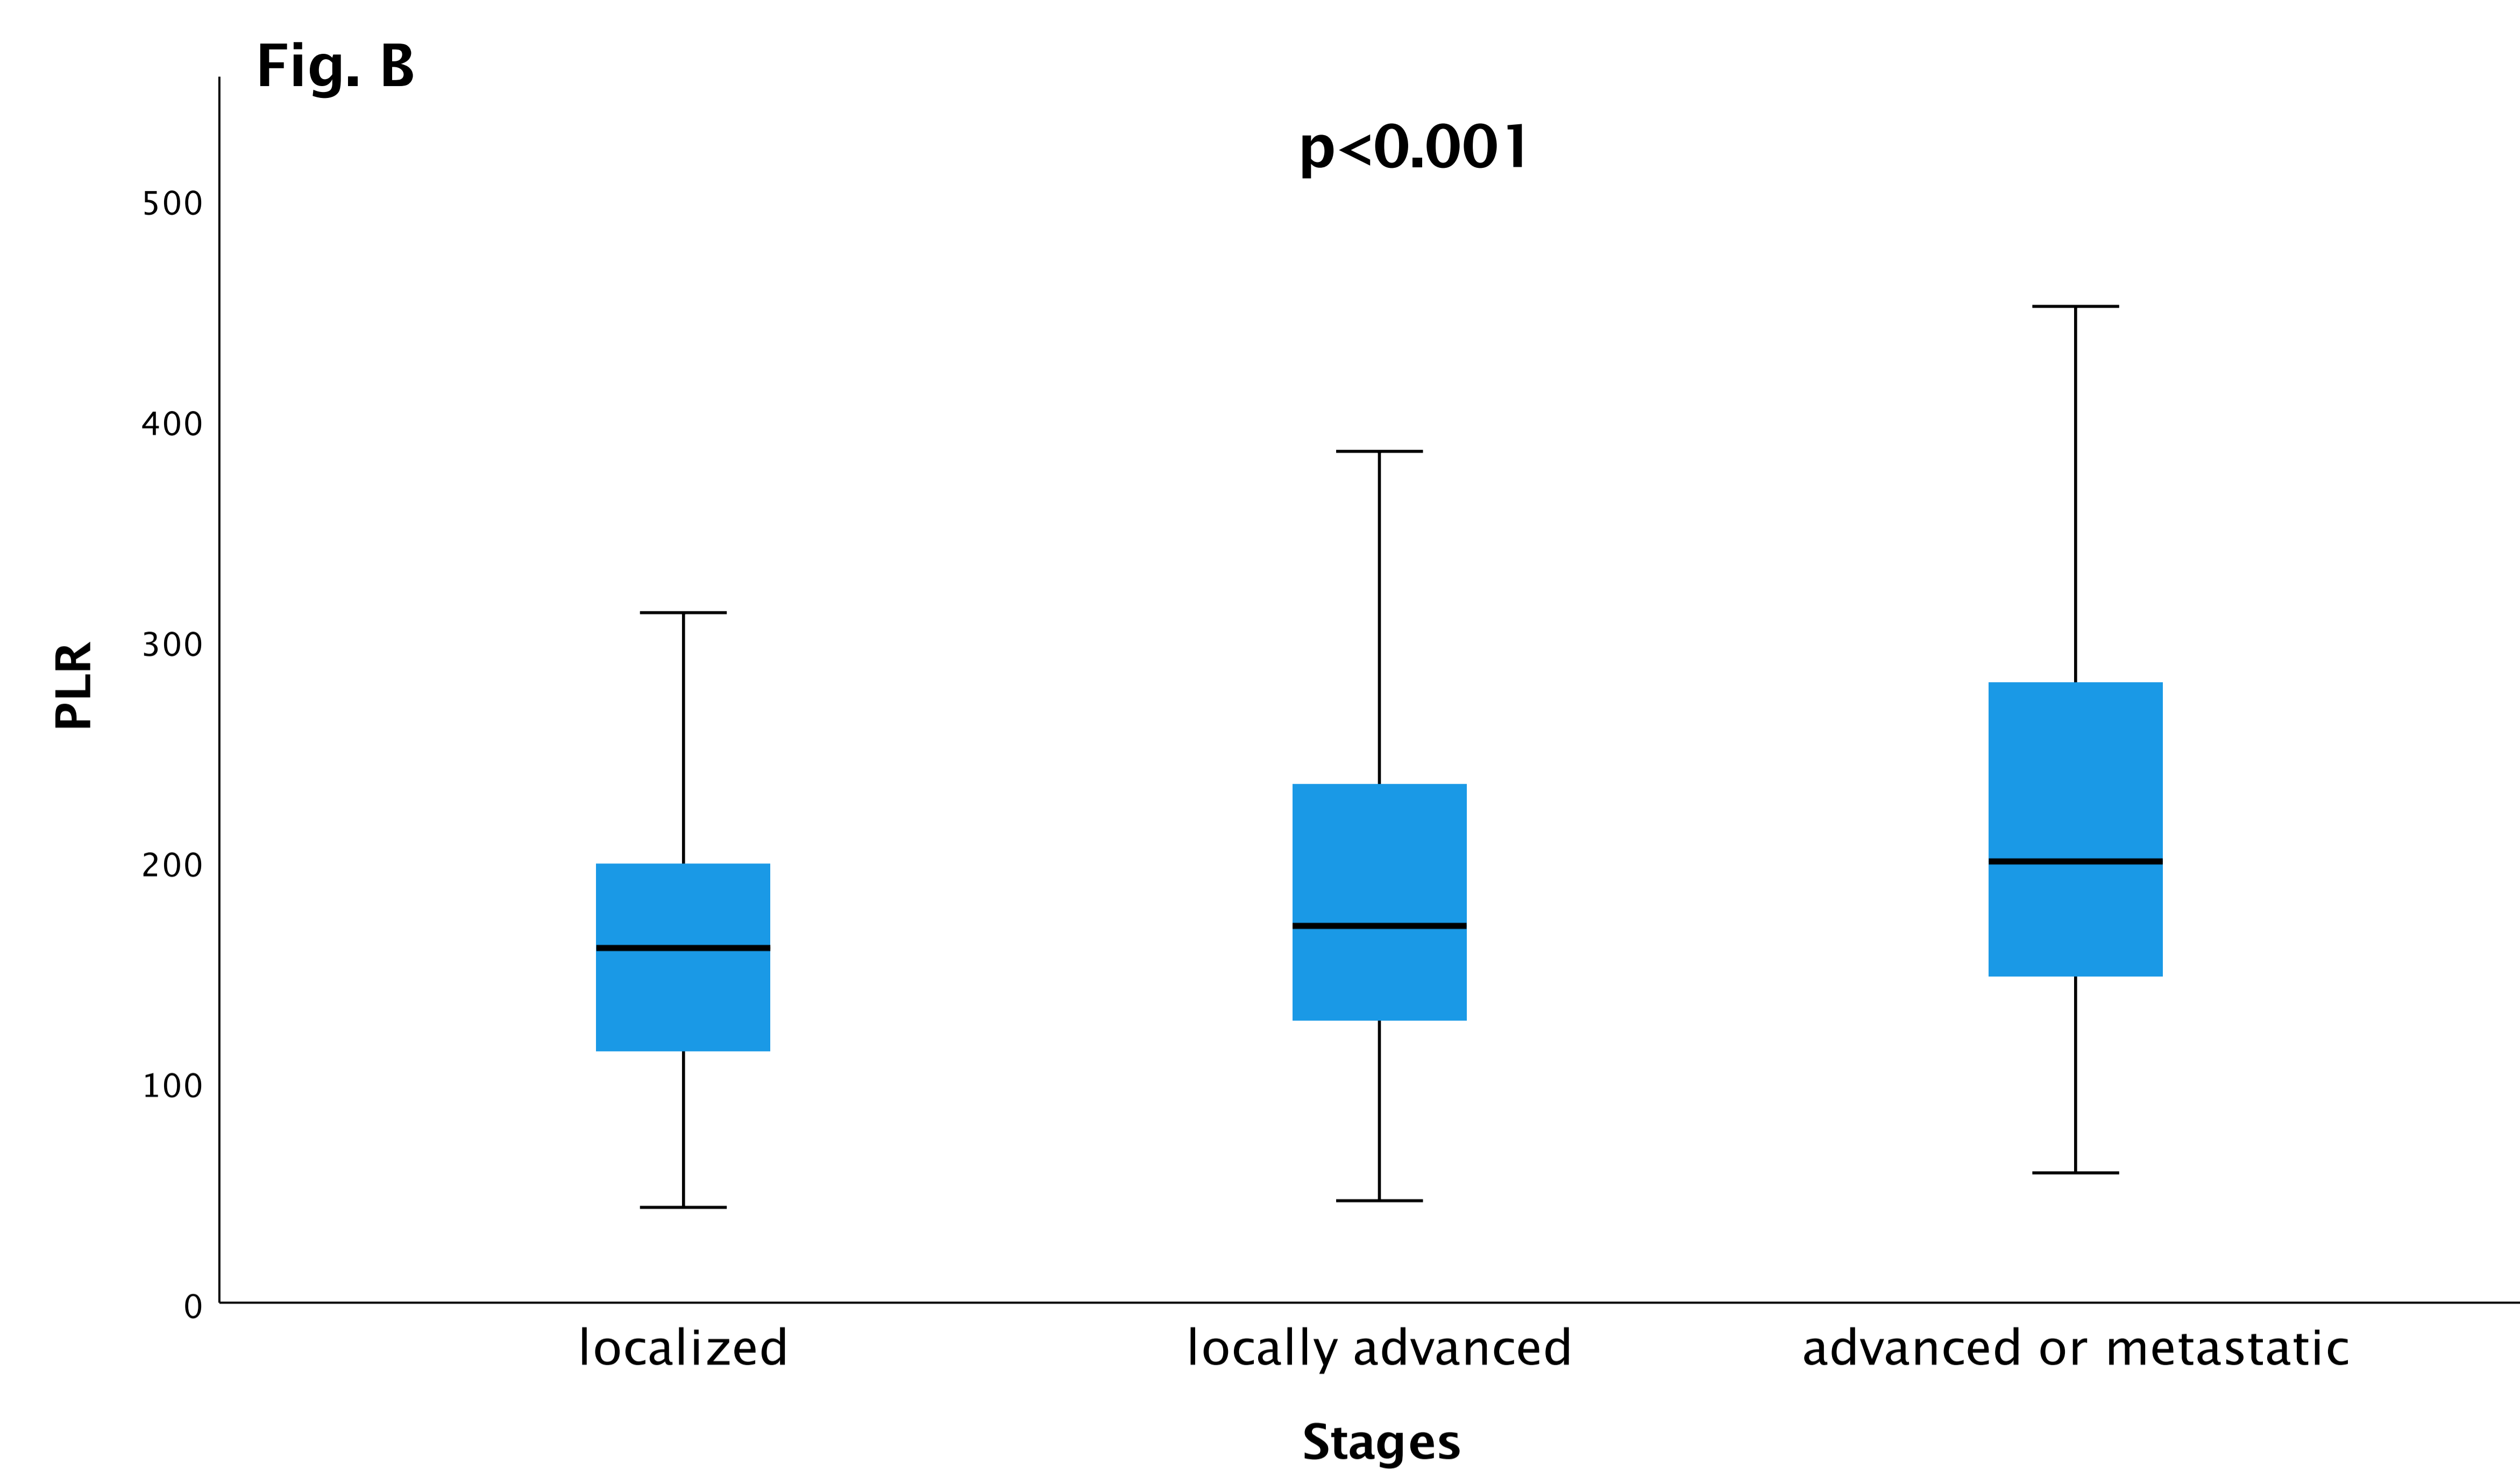**Fig. C****p<0.001**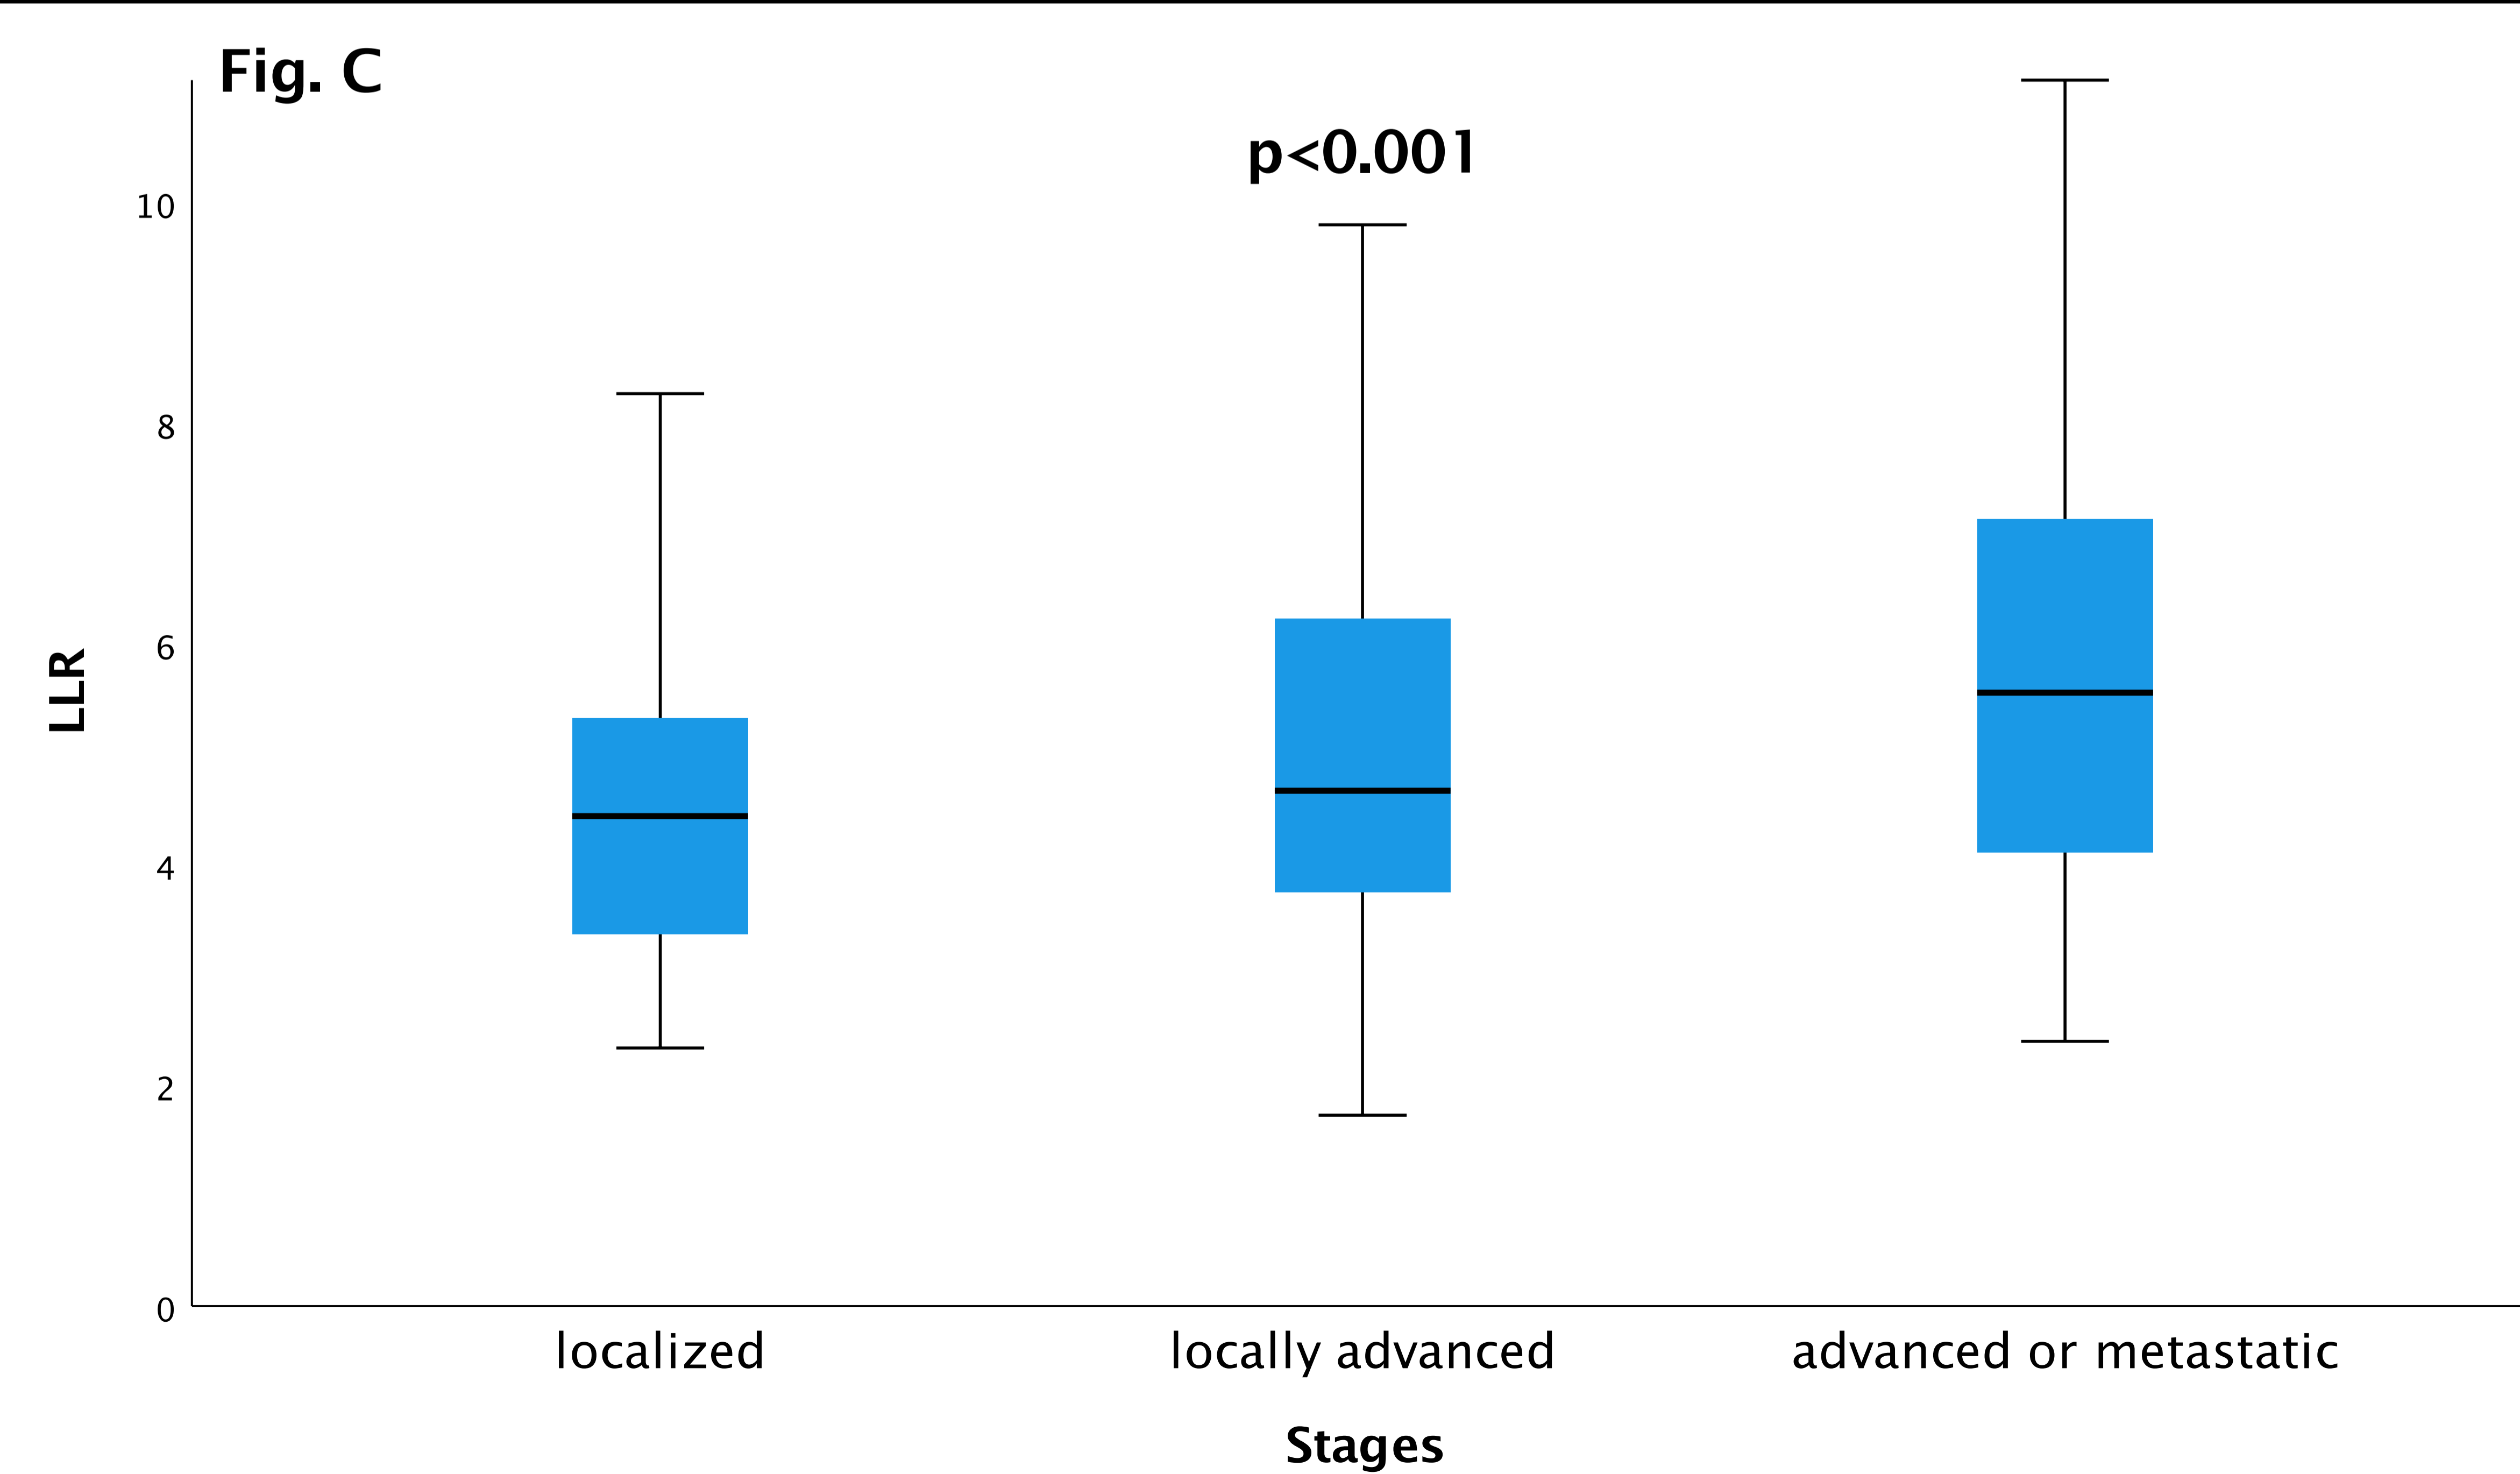**Fig. D****p<0.001**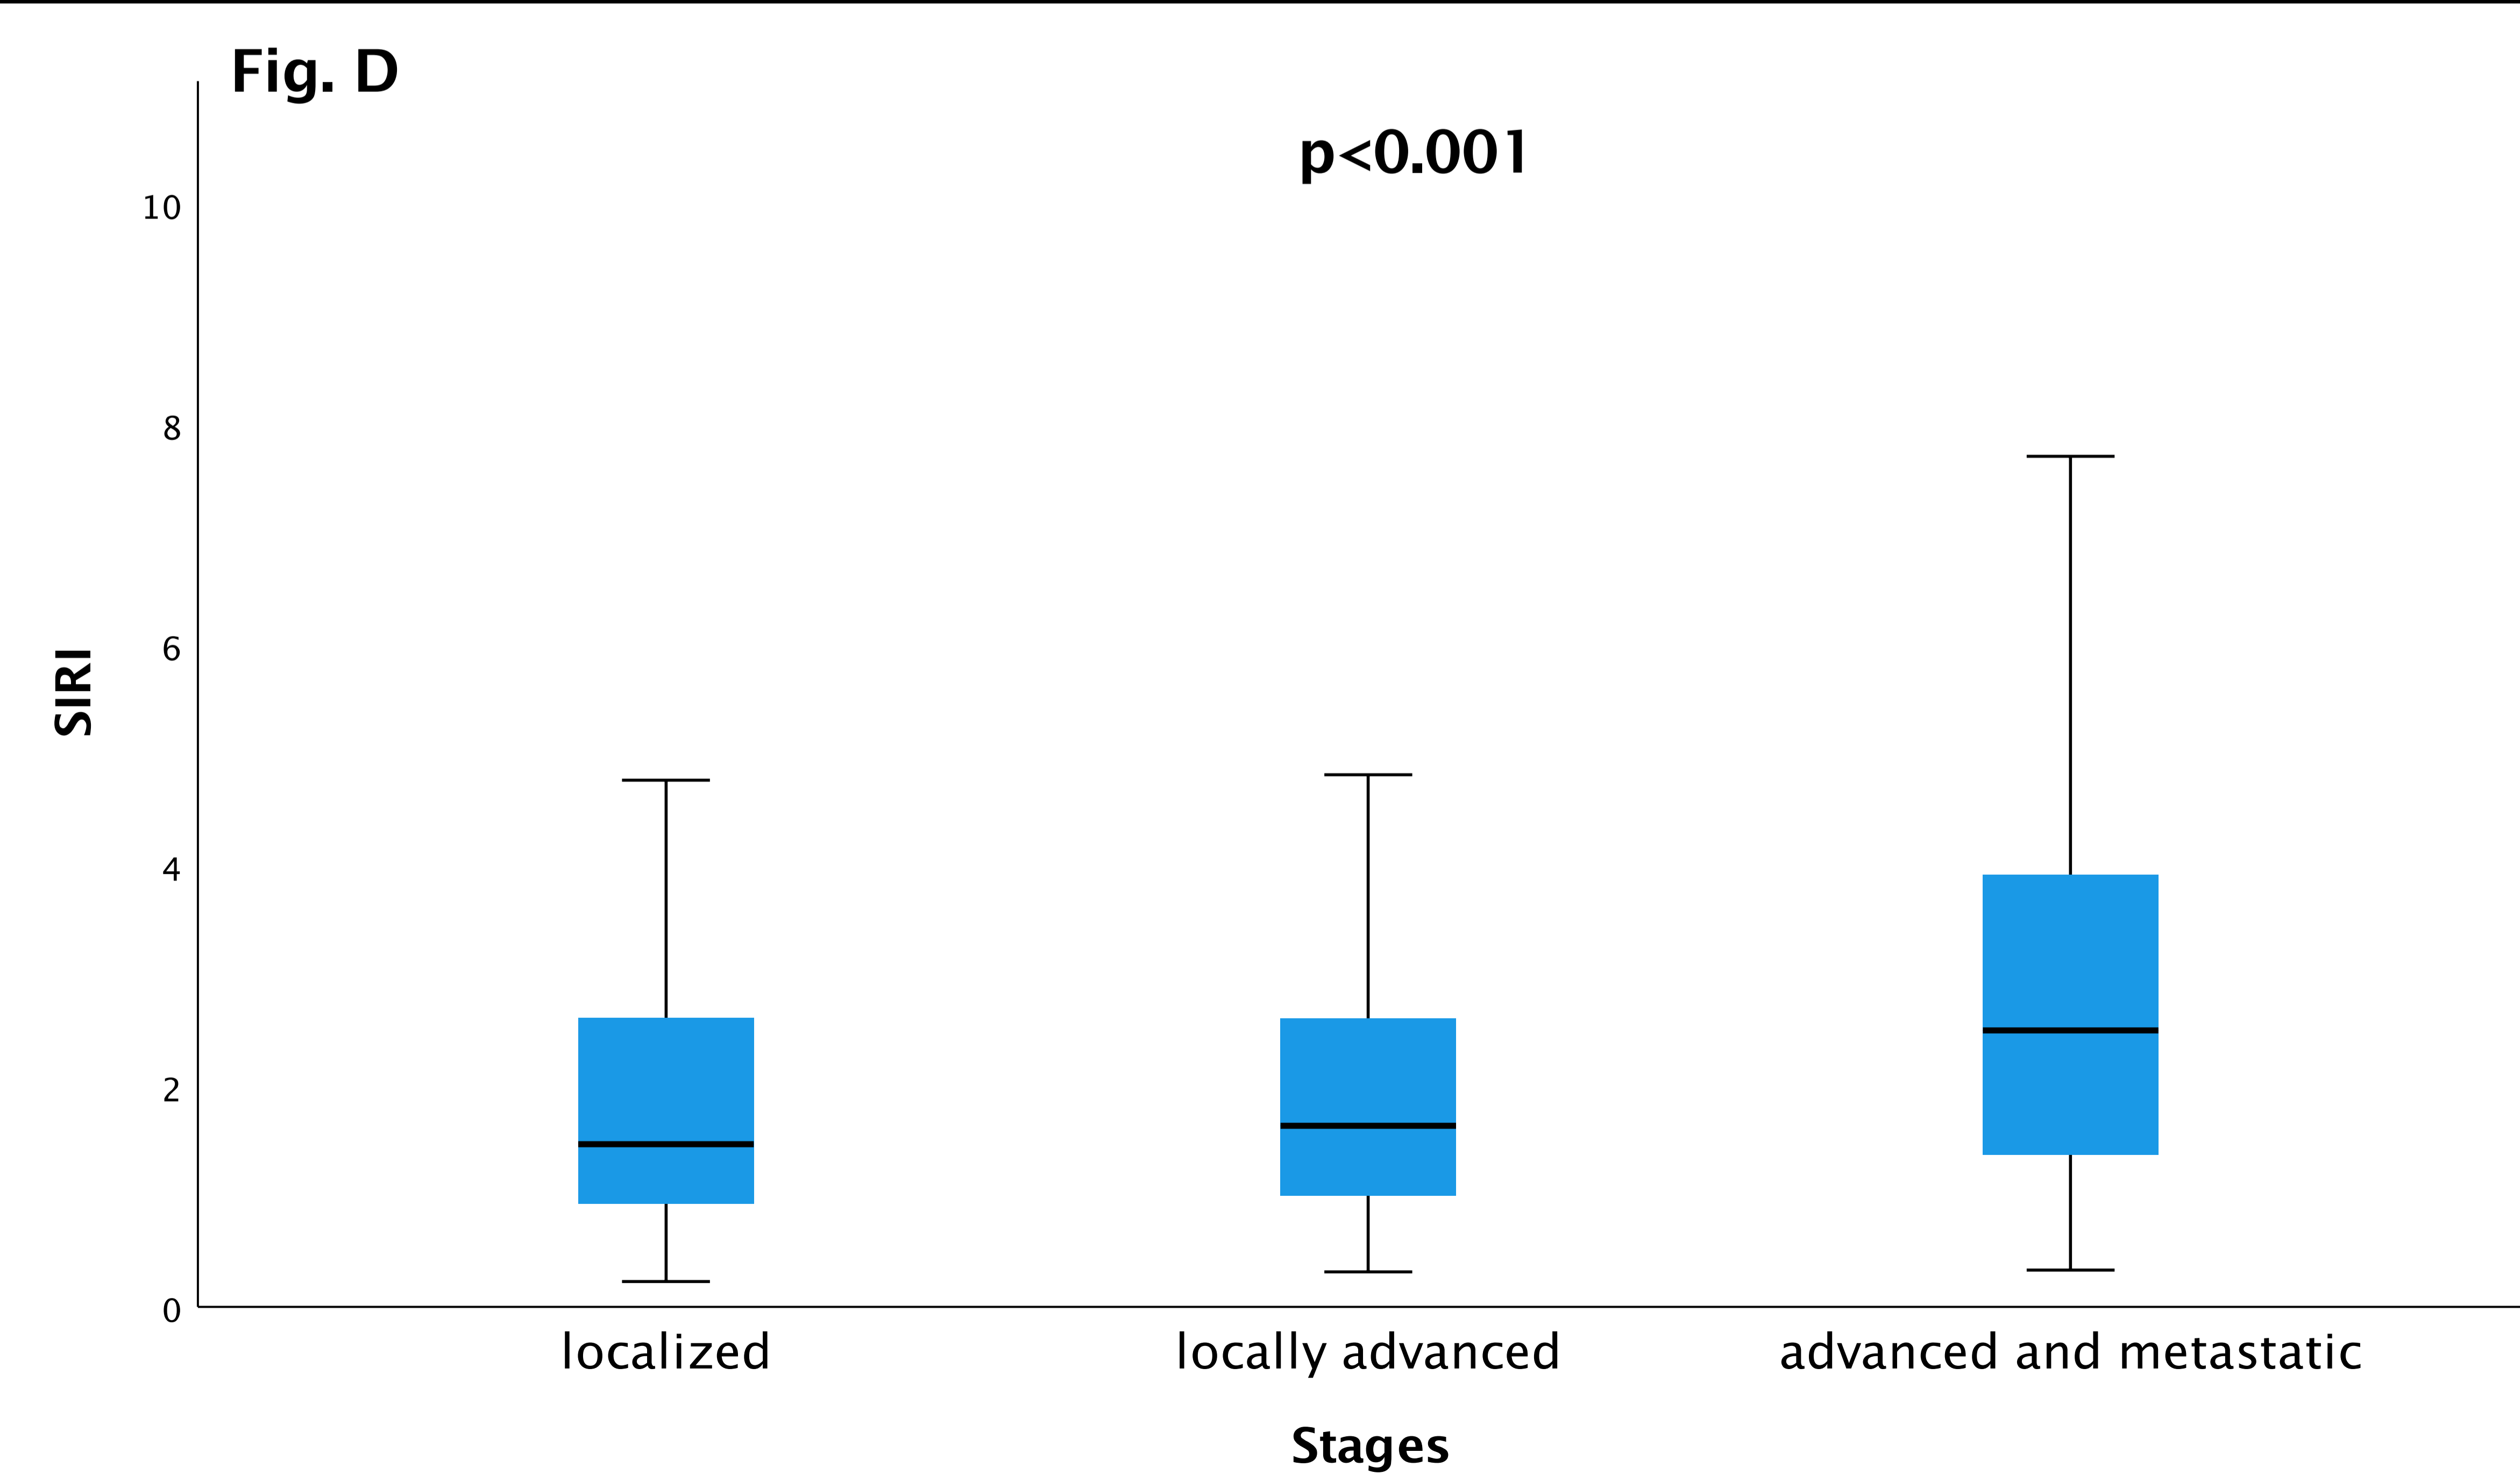

Supplement: MOESM1 [file 26089878]
